# Supplementary material
Source: PubMed Central journal article supplement (PMC3101006)
Supplement: supp_111.179093_JPET179093_SUPPLEMENTAL_DATA.pdf [file supp_111.179093_JPET179093_SUPPLEMENTAL_DATA.pdf]

SUPPLEMENTAL DATA

**HETEROMERIZATION OF THE MU AND DELTA OPIOID RECEPTOR  
PRODUCES LIGAND-BIASED ANTAGONISM AND ALTERS MU RECEPTOR  
TRAFFICKING.**

**Laura Milan-Lobo and Jennifer L. Whistler**

Ernest Gallo Clinic and Research Center (LML, JLW), Department of Neurology (JLW),

University of California, San Francisco, Emeryville, California 94608

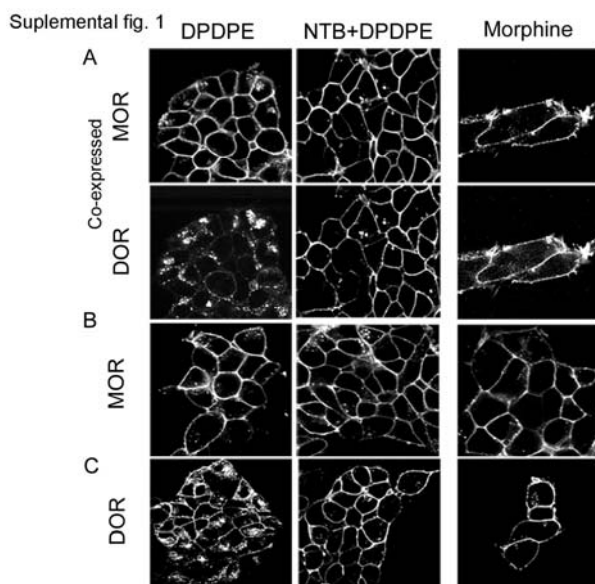

**Supplemental Figure 1:** *Effects of DPDPE and morphine on DOR/MOR endocytosis.* HEK293 cells stably expressing (A) FLAG-MOR and HA-DOR, (B) FLAG-MOR or (C) HA-DOR were incubated with antibody recognizing the N-terminal epitope tag(s) for 30 minutes to label surface receptors. Cells were then treated with 1  $\mu$ M of the MOR agonist morphine (MS for morphine sulfate, left panels), for 30 minutes at 37  $^{\circ}$ C, 1  $\mu$ M of the DOR agonist DPDPE for 30 minutes at 37  $^{\circ}$ C (middle panels) or 1  $\mu$ M of NTB followed 20 minutes later with 1  $\mu$ M of the DOR agonist DPDPE for 30 minutes at 37  $^{\circ}$ C. Cells were fixed and stained as in Methods. In cells co-expressing DOR and MOR, pictures were taken consecutively from dual color channels (green and red fluorescence). Images are representative examples of multiple independent experiments.

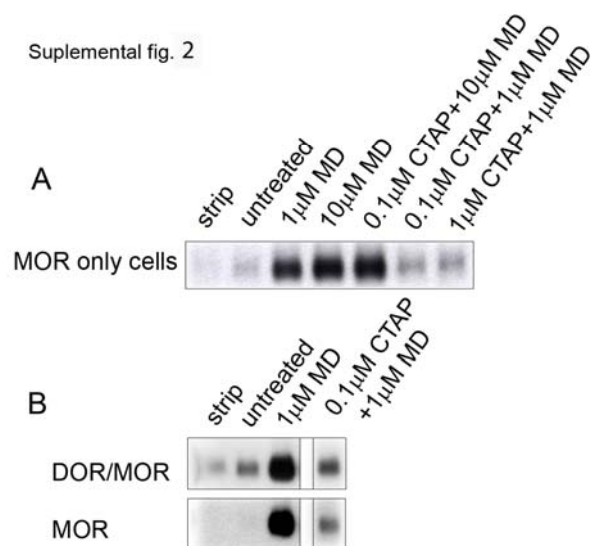

**Supplemental Figure 2:** *MOR* antagonist CTAP inhibits methadone-mediated endocytosis of *MOR* homomers and *DOR/MOR* heteromers. A) Endocytosis of *MOR* homomers from cells expressing only *MOR* was analyzed by biotin protection endocytosis assay as described in Methods. Cells were biotinylated then pre-treated with concentrations of CTAP as indicated for 20 minutes. Next, cells were treated with 1  $\mu$ M or 10  $\mu$ M of methadone (MD) for an additional 30 minutes. Endocytosed “protected” endocytosed receptors, were immunoprecipitated and resolved by SDS-PAGE gel. “Strip” lane demonstrates the efficiency with which biotin can be cleaved from surface receptors and represents the background. B) Endocytosis of *DOR/MOR* heteromers and *MOR* homomers from the same cell line was analyzed by biotin protection endocytosis assay as in (A). Cells were biotinylated, then pre-treated with 0.1  $\mu$ M CTAP for 20 minutes. Next, cells were treated with 1  $\mu$ M methadone (MD) for an additional 30 minutes. The fate of the protected endocytosed *DOR/MOR* heteromers (upper blot) and *MOR* homomers (lower blot) was assessed by serial immunoprecipitation followed by SDS-PAGE, as described in Methods. A representative immunoblot is shown.

Supplemental fig. 3

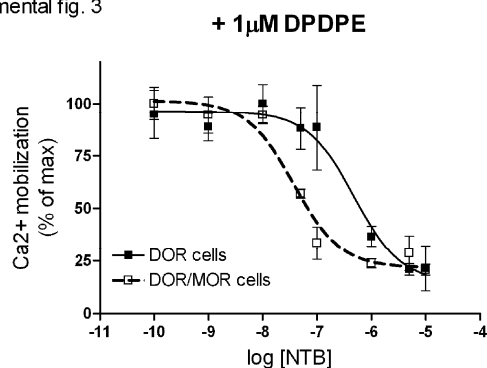

**Supplemental Figure 3:** *NTB inhibits DPDPE-mediated signaling from DOR homomers and DOR/MOR heteromers.* Cells co-expressing DOR/MOR (open squares) or DOR only (closed squares) were pre-treated with increasing concentration of the DOR antagonist NTB for 20 minutes. Calcium release due to chimeric G protein  $\Delta 6$ -G<sub>qi4</sub>-myr activation was measured in a Flex apparatus upon stimulation with the DOR agonist DPDPE (1  $\mu$ M). Maximal effect for DPDPE (RFU): DOR (741  $\pm$  95), DOR/MOR (734  $\pm$  92). Shown are the mean  $\pm$  S.E.M. n = 3 independent experiments.
